# Supplementary material
Source: PubMed Central journal article supplement (PMC5857978)
Supplement: supp_RA117.001260_134373_1_supp_54661_p2l62b.pdf [file supp_RA117.001260_134373_1_supp_54661_p2l62b.pdf]

Ring finger protein 145 (RNF145) is a ubiquitin ligase for sterol-induced degradation of HMG-CoA reductase

Supporting Information

**SUPPLEMENTARY FIGURE 1. Screening for ER-localized ubiquitin ligases involved in sterol-induced degradation of HMGCR**

The *gp78*-KO CHO cells were transfected with plasmids encoding HMGCR-T7, Insig-1-Myc and the shRNAs targeting ubiquitin ligases (Supplementary table). After 48 h, the cells were depleted of sterol and then treated with or without 10 mM Mevalonate plus indicated concentrations of 25-HC for 5 hr. Cells were harvested and subjected to SDS-PAGE followed by immunoblot analysis.

**SUPPLEMENTARY FIGURE 2. Knockout of *gp78* stabilized exogenous HMGCR and Insig-1**

The WT and *gp78*-KO CHO cells were transfected with indicated plasmids, depleted of sterol and treated with or without 1  $\mu$ g/ml 25-HC plus 10 mM Mevalonate for 5 h. Cells were harvested and subjected to SDS-PAGE followed by immunoblot analysis.

# SUPPLEMENTARY FIGURE 1

## Screening for ER-localized ubiquitin ligases involved in sterol-induced degradation of HMGCR

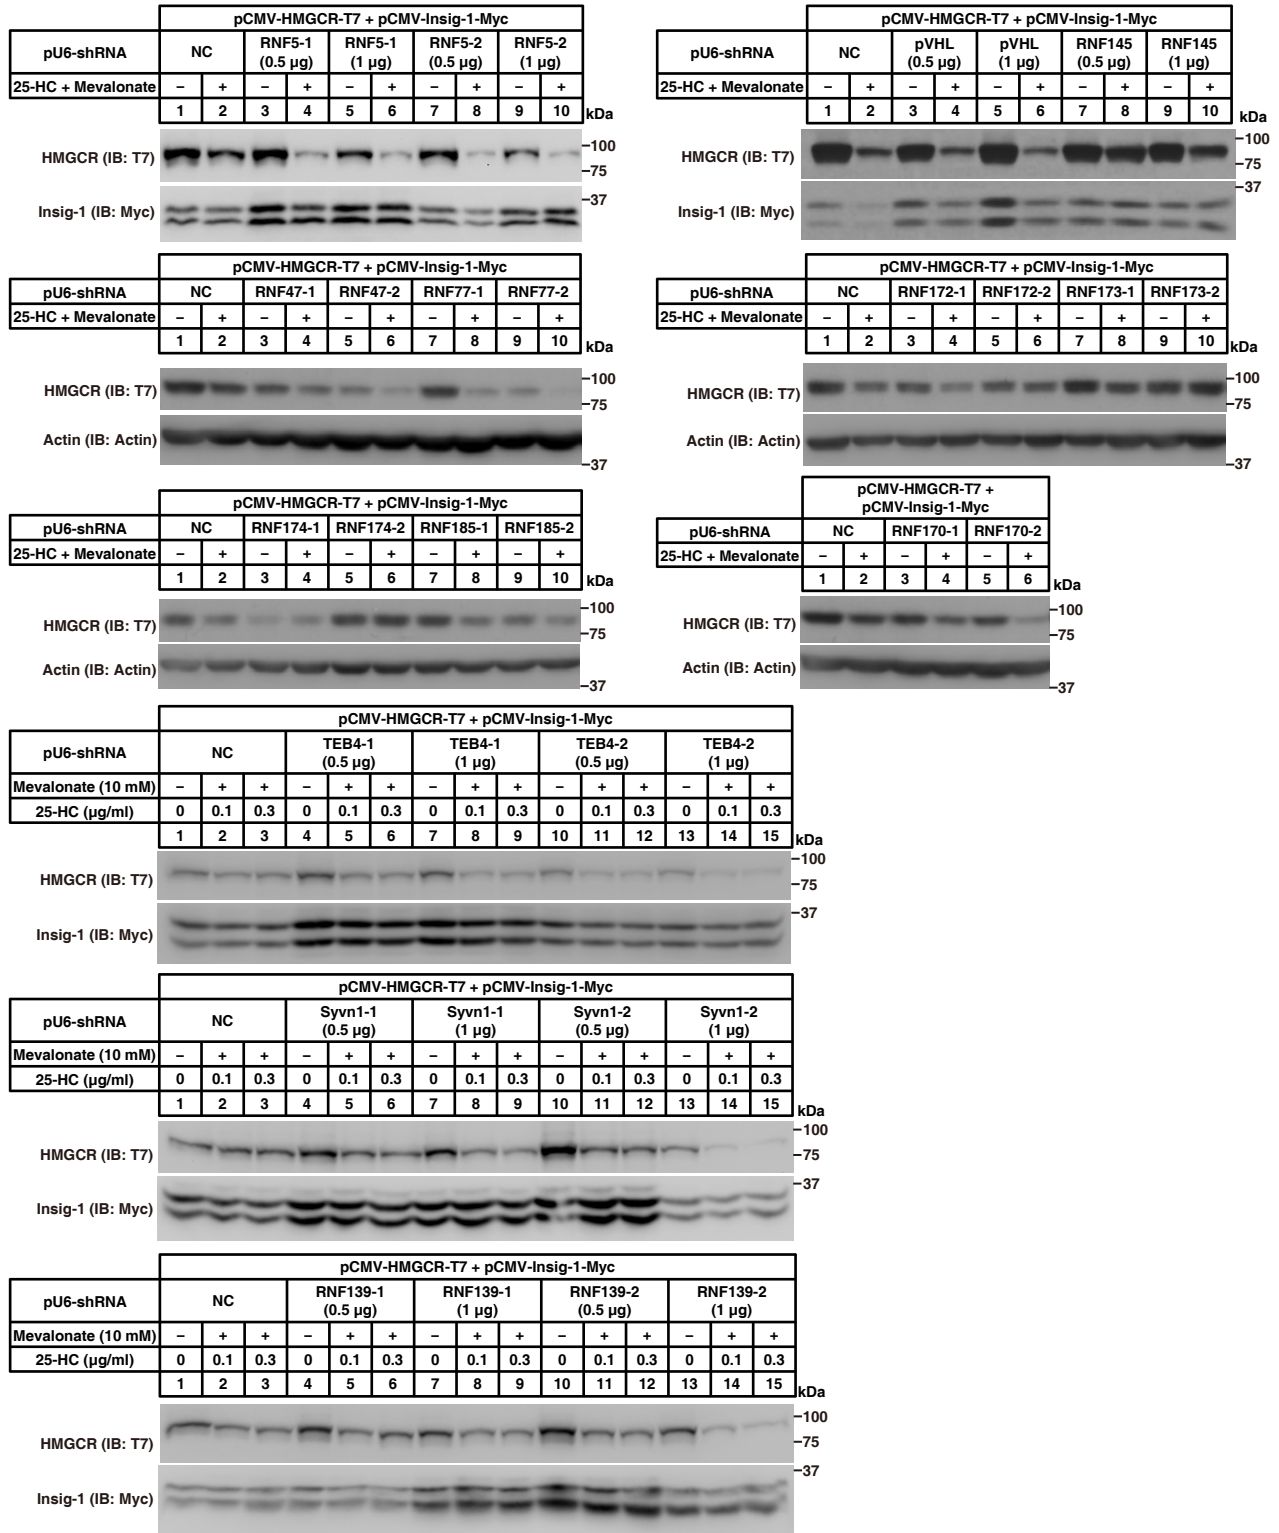

**SUPPLEMENTARY FIGURE 2**  
**Knockout of *gp78* stabilized exogenous HMGCR and Insig-1**

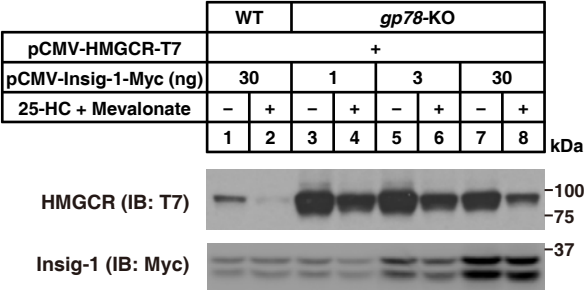

**Table S1**  
**Primers used to generate the plasmids expressing shRNAs**

|            | Sequence                                                     |
|------------|--------------------------------------------------------------|
| March6-1-F | CCGGGGAAAGAATGCTTGGGCTTGACTCGAGTCAAGCCAAGCATTCTTTCCTTTTTG    |
| March6-1-R | AATTCAAAAAGGAAAGAATGCTTGGGCTTGACTCGAGTCAAGCCAAGCATTCTTTC     |
| March6-2-F | CCGGGCTGGGAGTCTGCTATATTGTCTCGAGACAATATAGCAGACTCCCAGCTTTTTG   |
| March6-2-R | AATTCAAAAAGCTGGGAGTCTGCTATATTGTCTCGAGACAATATAGCAGACTCCCAGC   |
| Syvn-1-F   | CCGGGCAGCTGGTGTGTTGGCTTTGACTCGAGTCAAAGCCAAACACCAGCTGCTTTTTG  |
| Syvn-1-R   | AATTCAAAAAGCAGCTGGTGTGTTGGCTTTGACTCGAGTCAAAGCCAAACACCAGCTGC  |
| Syvn-2-F   | CCGGGCTCTACACGGAGCTGTTTACCTCGAGGTAACAGCTCCGTGTAGAGCTTTTTG    |
| Syvn-2-R   | AATTCAAAAAGCTCTACACGGAGCTGTTTACCTCGAGGTAACAGCTCCGTGTAGAGC    |
| RNF5-1-F   | CCGGGCGCGACCTTCGAATGTAATACTCGAGTATTACATTCTGAAGGTCGCGCTTTTTG  |
| RNF5-1-R   | AATTCAAAAAGCGCGACCTTCGAATGTAATACTCGAGTATTACATTCTGAAGGTCGCGC  |
| RNF5-2-F   | CCGGGCTAGAGGAGAATCAGTATTGCTCGAGCAATACTGATTCTCCTCTAGCTTTTTG   |
| RNF5-2-R   | AATTCAAAAAGCTAGAGGAGAATCAGTATTGCTCGAGCAATACTGATTCTCCTCTAGC   |
| RNF47-1-F  | CCGGGCCCTCAGATTTCTGTGAATGCTCGAGCATTACAGAAATCTGAGGGCTTTTTG    |
| RNF47-1-R  | AATTCAAAAAGCCCTCAGATTTCTGTGAATGCTCGAGCATTACAGAAATCTGAGGGC    |
| RNF47-2-F  | CCGGGCCCTAGCTTTATGGTGGATGTCTCGAGACATCCACCATAAAGCTAGGCTTTTTG  |
| RNF47-2-R  | AATTCAAAAAGCCTAGCTTTATGGTGGATGTCTCGAGACATCCACCATAAAGCTAGGC   |
| RNF77-1-F  | CCGGGGATGTGATGGAGCTGCTTGACTCGAGTCAAGCAGCTCCATCACATCCTTTTTG   |
| RNF77-1-R  | AATTCAAAAAGGATGTGATGGAGCTGCTTGACTCGAGTCAAGCAGCTCCATCACATCC   |
| RNF77-2-F  | CCGGGGGAATGTGCGGAATTCATTGCTCGAGCAATGAATCCGCACATTCCCTTTTTG    |
| RNF77-2-R  | AATTCAAAAAGGGAATGTGCGGAATTCATTGCTCGAGCAATGAATCCGCACATTCCC    |
| RNF139-1-F | CCGGGCTCTTCAGACTGGCTTAAGTCTCGAGACTTAAGCCAGTCTGAAGAGCTTTTTG   |
| RNF139-1-R | AATTCAAAAAGCTCTTCAGACTGGCTTAAGTCTCGAGACTTAAGCCAGTCTGAAGAGC   |
| RNF139-2-F | CCGGGGGCCTATACCATGATGTTTGCTCGAGCAAACATCATGGTATAGGCCCTTTTTG   |
| RNF139-2-R | AATTCAAAAAGGGCCTATACCATGATGTTTGCTCGAGCAAACATCATGGTATAGGCC    |
| VHL-F      | CCGGGGTGTCTAAGGATAAACATCACTCGAGTGATGTTTATCCTTAAGCACCTTTTTG   |
| VHL-R      | AATTCAAAAAGGTGCTTAAGGATAAACATCACTCGAGTGATGTTTATCCTTAAGCAC    |
| RNF145-F   | CCGGGCAGCATCTGGTTCAGCTTTACTCGAGTAAAGCTGAACCAGATGCTGCTTTTTG   |
| RNF145-R   | AATTCAAAAAGCAGCATCTGGTTCAGCTTTACTCGAGTAAAGCTGAACCAGATGCTGC   |
| RNF170-1-F | CCGGGGATGATTCAGTTATAGAAGGCTCGAGCCTTCTATAACTGAATCATCCTTTTTG   |
| RNF170-1-R | AATTCAAAAAGGATGATTCAGTTATAGAAGGCTCGAGCCTTCTATAACTGAATCATCC   |
| RNF170-2-F | CCGGGCTCGACAGCAGTTCTATACTCTCGAGAGTATAGAAGTCTGCTGTCGAGCTTTTTG |
| RNF170-2-R | AATTCAAAAAGCTCGACAGCAGTTCTATACTCTCGAGAGTATAGAAGTCTGCTGTCGAGC |
| RNF172-1-F | CCGGGCACTGAGAAGCGGACATTGTCTCGAGACAATGTCCGCTTCTCAGTGCTTTTTG   |
| RNF172-1-R | AATTCAAAAAGCACTGAGAAGCGGACATTGTCTCGAGACAATGTCCGCTTCTCAGTGC   |
| RNF172-2-F | CCGGGGAGGAAGACCAATCAGAAAGCTCGAGCTTTCTGATTGGTCTTCTCCTTTTTG    |
| RNF172-2-R | AATTCAAAAAGGAGGAAGACCAATCAGAAAGCTCGAGCTTTCTGATTGGTCTTCTCCTCC |
| RNF173-1-F | CCGGGCCACAGTATGTCATGCAAGTCTCGAGACTTGCATGACATACTGTGGCTTTTTG   |
| RNF173-1-R | AATTCAAAAAGCCACAGTATGTCATGCAAGTCTCGAGACTTGCATGACATACTGTGGC   |
| RNF173-2-F | CCGGGGACCAATCAGAGGGTATTCTCGAGGAATCACCTCTGATTGGTCTTTTTG       |
| RNF173-2-R | AATTCAAAAAGGACCAATCAGAGGGTATTCTCGAGGAATCACCTCTGATTGGTCTCC    |
| RNF174-1-F | CCGGGCCTCCTTCTGTGGAAGATGACTCGAGTCATCTTCCACAGAAGGAGGCTTTTTG   |
| RNF174-1-R | AATTCAAAAAGCCTCCTTCTGTGGAAGATGACTCGAGTCATCTTCCACAGAAGGAGGC   |
| RNF174-2-F | CCGGGCTGTGAGCTGTGTTACTACACTCGAGTGTAGTAACACAGCTCACAGCTTTTTG   |
| RNF174-2-R | AATTCAAAAAGCTGTGAGCTGTGTTACTACACTCGAGTGTAGTAACACAGCTCACAGC   |
| RNF185-1-F | CCGGGCTTCTCCATTAGAGCTTTGACTCGAGTCAAAGCTCTAATGGAGAAGCTTTTTG   |
| RNF185-1-R | AATTCAAAAAGCTTCTCCATTAGAGCTTTGACTCGAGTCAAAGCTCTAATGGAGAAGC   |
| RNF185-2-F | CCGGGCTGTAACACCCTCTATAACCTCGAGGTTATAGAGGGTGTTCACAGCTTTTTG    |
| RNF185-2-R | AATTCAAAAAGCTGTAACACCCTCTATAACCTCGAGGTTATAGAGGGTGTTCACAGC    |
